# Supplementary material for: Examining the Change of Human Mobility Adherent to Social Restriction Policies and Its Effect on COVID-19 Cases in Australia
Source: PubMed Central journal article supplement (PMC7662641; doi:10.3390/ijerph17217930), 2020-10-29
Supplement: ijerph-17-07930-s001.pdf [file ijerph-17-07930-s001.pdf]

**Supplementary Materials:** The following are available online at [www.mdpi.com/xxx/s1](http://www.mdpi.com/xxx/s1).

Table S1. Correlation coefficients

|                                                  | 1 <sup>st</sup> Wave |               |               |              |               |               |               |               |              | 2 <sup>nd</sup> Wave |
|--------------------------------------------------|----------------------|---------------|---------------|--------------|---------------|---------------|---------------|---------------|--------------|----------------------|
|                                                  | AUS                  | NSW           | VIC           | QLD          | WA            | SA            | NT            | TAS           | ACT          | VIC                  |
| <i>Between growth rate and mobility change</i>   |                      |               |               |              |               |               |               |               |              |                      |
| Lockdown                                         | <b>0.494</b>         | <b>0.406</b>  | <b>0.551</b>  | <b>0.435</b> | <b>0.420</b>  | <b>0.411</b>  | -0.039        | <b>0.337</b>  | <b>0.508</b> | -0.241               |
| 7 Days after lockdown                            | <b>0.780</b>         | <b>0.733</b>  | <b>0.812</b>  | <b>0.615</b> | <b>0.627</b>  | <b>0.601</b>  | 0.176         | <b>0.553</b>  | <b>0.573</b> | -0.233               |
| 14 Days after lockdown                           | <b>0.792</b>         | <b>0.777</b>  | <b>0.812</b>  | <b>0.625</b> | <b>0.598</b>  | <b>0.633</b>  | <b>0.233</b>  | <b>0.531</b>  | <b>0.478</b> | -0.085               |
| <i>Between doubling time and mobility change</i> |                      |               |               |              |               |               |               |               |              |                      |
| Lockdown                                         | 0.162                | 0.038         | -0.121        | 0.105        | -0.115        | -0.190        | <b>-0.314</b> | <b>-0.272</b> | -0.191       | <b>0.369</b>         |
| 7 Days after lockdown                            | -0.041               | -0.155        | <b>-0.293</b> | -0.057       | <b>-0.244</b> | <b>-0.303</b> | -0.135        | <b>-0.276</b> | -0.042       | <b>0.326</b>         |
| 14 Days after lockdown                           | <b>-0.242</b>        | <b>-0.235</b> | <b>-0.339</b> | -0.189       | <b>-0.225</b> | -0.138        | 0.128         | <b>-0.286</b> | -0.028       | 0.167                |

Note: values in bold indicate  $p < 0.01$ .

Table S2. R square of each regression model

|                                                | 1 <sup>st</sup> Wave |       |       |       |       |       |       |       |       | 2 <sup>nd</sup> Wave |
|------------------------------------------------|----------------------|-------|-------|-------|-------|-------|-------|-------|-------|----------------------|
|                                                | AUS                  | NSW   | VIC   | QLD   | WA    | SA    | NT    | TAS   | ACT   | VIC                  |
| <i>Growth rate as the dependent variable</i>   |                      |       |       |       |       |       |       |       |       |                      |
| Lockdown                                       | 0.578                | 0.481 | 0.560 | 0.656 | 0.581 | 0.476 | 0.040 | 0.309 | 0.493 | 0.525                |
| 7 Days after lockdown                          | 0.867                | 0.769 | 0.907 | 0.881 | 0.807 | 0.814 | 0.339 | 0.68  | 0.792 | 0.262                |
| 14 Days after lockdown                         | 0.923                | 0.880 | 0.881 | 0.704 | 0.610 | 0.649 | 0.162 | 0.489 | 0.496 | 0.136                |
| <i>Doubling time as the dependent variable</i> |                      |       |       |       |       |       |       |       |       |                      |
| Lockdown                                       | 0.302                | 0.042 | 0.088 | 0.145 | 0.082 | 0.250 | 0.084 | 0.207 | 0.097 | 0.412                |
| 7 Days after lockdown                          | 0.237                | 0.067 | 0.398 | 0.272 | 0.391 | 0.429 | 0.278 | 0.441 | 0.373 | 0.253                |
| 14 Days after lockdown                         | 0.214                | 0.094 | 0.159 | 0.101 | 0.086 | 0.138 | 0.116 | 0.223 | 0.116 | 0.182                |

Table S3-1. Coefficients of each type of mobility with growth rate as the dependent variable

|                        |                  | 1 <sup>st</sup> Wave |               |               |               |               |               |        |              |               | 2 <sup>nd</sup> Wave |
|------------------------|------------------|----------------------|---------------|---------------|---------------|---------------|---------------|--------|--------------|---------------|----------------------|
|                        |                  | AUS                  | NSW           | VIC           | QLD           | WA            | SA            | NT     | TAS          | ACT           | VIC                  |
| Lockdown               | RetailRecreation | <b>-1.227</b>        | <b>-0.841</b> | <b>-0.966</b> | <b>-1.037</b> | <b>-0.725</b> | <b>-1.186</b> | -0.108 | -0.401       | <b>-0.609</b> | 1.115                |
|                        | GroceryPharmacy  | <b>0.761</b>         | <b>0.864</b>  | <b>0.513</b>  | <b>0.558</b>  | 0.172         | <b>0.675</b>  | 0.140  | -0.298       | <b>0.679</b>  | 0.391                |
|                        | Parks            | 0.075                | 0.029         | 0.107         | -0.139        | -0.129        | 0.096         | -0.232 | 0.171        | -0.026        | 0.134                |
|                        | TransitStations  | <b>1.141</b>         | 0.642         | <b>1.159</b>  | <b>1.402</b>  | <b>1.434</b>  | <b>0.840</b>  | 0.240  | <b>0.879</b> | 0.614         | <b>-2.352</b>        |
|                        | Workplaces       | <b>0.036</b>         | 0.130         | <b>0.074</b>  | <b>-0.334</b> | -0.269        | -0.017        | -0.249 | -0.060       | -0.140        | <b>1.019</b>         |
|                        | Residence        | 0.213                | 0.315         | 0.237         | -0.068        | 0.160         | -0.133        | -0.060 | -0.060       | -0.164        | 0.335                |
| 7 Days after lockdown  | RetailRecreation | -0.360               | -0.339        | -0.200        | -0.101        | -0.159        | <b>-0.700</b> | 0.372  | -0.051       | -0.394        | 1.304                |
|                        | GroceryPharmacy  | <b>0.325</b>         | <b>0.375</b>  | 0.177         | 0.050         | 0.058         | <b>0.529</b>  | -0.002 | -0.022       | <b>0.354</b>  | -0.042               |
|                        | Parks            | <b>-0.259</b>        | <b>-0.231</b> | -0.108        | <b>-0.186</b> | <b>-0.320</b> | -0.031        | -0.361 | -0.425       | -0.129        | -0.214               |
|                        | TransitStations  | <b>1.862</b>         | <b>1.724</b>  | <b>1.522</b>  | <b>1.402</b>  | <b>1.526</b>  | <b>1.434</b>  | 0.366  | <b>1.439</b> | <b>1.585</b>  | <b>-1.563</b>        |
|                        | Workplaces       | <b>-0.737</b>        | -0.455        | <b>-0.482</b> | <b>-0.623</b> | <b>-0.609</b> | <b>-0.843</b> | -0.480 | -0.369       | <b>-1.181</b> | 0.656                |
|                        | Residence        | 0.047                | 0.346         | 0.129         | -0.112        | 0.008         | -0.226        | -0.094 | 0.063        | -0.296        | 0.193                |
| 14 Days after lockdown | RetailRecreation | <b>0.524</b>         | 0.093         | 0.407         | 0.330         | 0.355         | 0.419         | 0.417  | 0.280        | -0.104        | 1.285                |

|  |                 |               |               |               |              |               |               |        |        |               |        |
|--|-----------------|---------------|---------------|---------------|--------------|---------------|---------------|--------|--------|---------------|--------|
|  | GroceryPharmacy | <b>-0.369</b> | <b>-0.252</b> | <b>-0.286</b> | -0.286       | -0.244        | -0.276        | -0.286 | -0.417 | -0.116        | -0.245 |
|  | Parks           | <b>-0.252</b> | -0.124        | <b>-0.191</b> | -0.154       | -0.152        | 0.072         | -0.006 | 0.390  | -0.187        | -0.166 |
|  | TransitStations | <b>1.595</b>  | <b>1.672</b>  | <b>1.431</b>  | <b>1.132</b> | <b>1.271</b>  | <b>0.748</b>  | 0.308  | 0.201  | <b>1.330</b>  | -1.095 |
|  | Workplaces      | <b>-0.633</b> | -0.300        | <b>-0.660</b> | -0.519       | <b>-0.769</b> | <b>-0.534</b> | -0.162 | -0.526 | <b>-1.055</b> | 0.627  |
|  | Residence       | 0.145         | 0.348         | -0.022        | -0.081       | 0.023         | -0.139        | 0.079  | -0.580 | -0.478        | 0.232  |

Note: values in bold indicate  $p < 0.01$ .

Table S3-2. Coefficients of each type of mobility with doubling time as the dependent variable

|                        |                  | 1 <sup>st</sup> Wave |        |        |        |               |              |               |               |              | 2 <sup>nd</sup> Wave |
|------------------------|------------------|----------------------|--------|--------|--------|---------------|--------------|---------------|---------------|--------------|----------------------|
|                        |                  | AUS                  | NSW    | VIC    | QLD    | WA            | SA           | NT            | TAS           | ACT          | VIC                  |
| Lockdown               | RetailRecreation | <b>1.227</b>         | 0.510  | 0.447  | 0.671  | 0.092         | 0.028        | -0.491        | <b>-1.226</b> | -0.123       | -0.588               |
|                        | GroceryPharmacy  | <b>-0.842</b>        | -0.100 | -0.131 | -0.315 | -0.212        | <b>0.629</b> | 0.344         | <b>0.650</b>  | 0.273        | -0.275               |
|                        | Parks            | 0.005                | -0.056 | -0.085 | 0.189  | 0.013         | 0.113        | -0.164        | 0.098         | -0.016       | -0.253               |
|                        | TransitStations  | -0.502               | -0.348 | -0.435 | -0.351 | -0.032        | -0.294       | 0.005         | -0.061        | -0.087       | <b>1.853</b>         |
|                        | Workplaces       | 0.066                | 0.065  | -0.365 | -0.263 | -0.494        | -0.340       | -0.242        | -0.285        | -0.240       | <b>-0.829</b>        |
|                        | Residence        | -0.177               | 0.056  | -0.388 | -0.192 | -0.483        | 0.299        | -0.277        | -0.569        | -0.007       | -0.276               |
| 7 Days after lockdown  | RetailRecreation | 0.745                | 0.572  | -0.309 | 0.309  | 0.492         | -0.134       | -0.417        | -0.766        | -0.293       | -1.177               |
|                        | GroceryPharmacy  | <b>-0.574</b>        | -0.176 | -0.114 | -0.161 | -0.182        | 0.104        | 0.148         | 0.378         | 0.309        | 0.26                 |
|                        | Parks            | 0.441                | -0.223 | 0.258  | 0.125  | <b>-0.427</b> | 0.005        | -0.293        | 0.090         | <b>0.331</b> | 0.141                |
|                        | TransitStations  | <b>-1.432</b>        | -0.541 | -0.007 | -0.547 | -0.078        | 0.304        | 0.173         | 0.458         | 0.089        | <b>1.244</b>         |
|                        | Workplaces       | <b>1.056</b>         | -0.245 | -0.075 | 0.049  | -0.123        | 0.111        | -0.519        | -0.037        | 0.230        | -0.886               |
|                        | Residence        | 0.243                | -0.354 | 0.016  | -0.162 | 0.143         | 0.709        | -0.604        | 0.400         | 0.524        | -0.46                |
| 14 Days after lockdown | RetailRecreation | <b>1.314</b>         | 0.435  | 0.622  | 0.444  | 0.127         | -0.570       | 0.195         | -0.315        | -0.980       | -1.137               |
|                        | GroceryPharmacy  | -0.423               | -0.070 | -0.167 | -0.253 | 0.013         | 0.272        | 0.113         | 0.123         | <b>0.540</b> | 0.459                |
|                        | Parks            | 0.003                | 0.046  | -0.051 | 0.090  | 0.116         | 0.276        | -0.410        | -0.262        | -0.097       | -0.094               |
|                        | TransitStations  | <b>-1.647</b>        | -0.409 | -0.929 | -0.753 | -0.571        | 0.116        | 0.382         | <b>1.165</b>  | 0.619        | 0.925                |
|                        | Workplaces       | -0.037               | -0.440 | 0.048  | 0.419  | 0.321         | 0.689        | <b>-0.735</b> | -0.102        | -0.124       | <b>-1.097</b>        |
|                        | Residence        | -0.465               | -0.186 | -0.088 | 0.190  | 0.167         | 0.738        | -0.421        | 0.932         | -0.098       | -0.559               |

Note: values in bold indicate  $p < 0.01$ .
